# Supplementary material
Source: PubMed Central journal article supplement (PMC1617168)
Supplement: rsbl20050333s02.pdf [file rsbl20050333s02.pdf]

# ELECTRONIC APPENDIX

This is the Electronic Appendix to the article

**Bigger is not always better—when brains get smaller**

by

Kamran Safi, Marc A. Seid and Dina K. N. Dechmann

*Biol. Lett.* ([doi:10.1098/rsbl.2005.0333](https://doi.org/10.1098/rsbl.2005.0333))

Electronic appendices are refereed with the text; however, no attempt is made to impose a uniform editorial style on the electronic appendices.

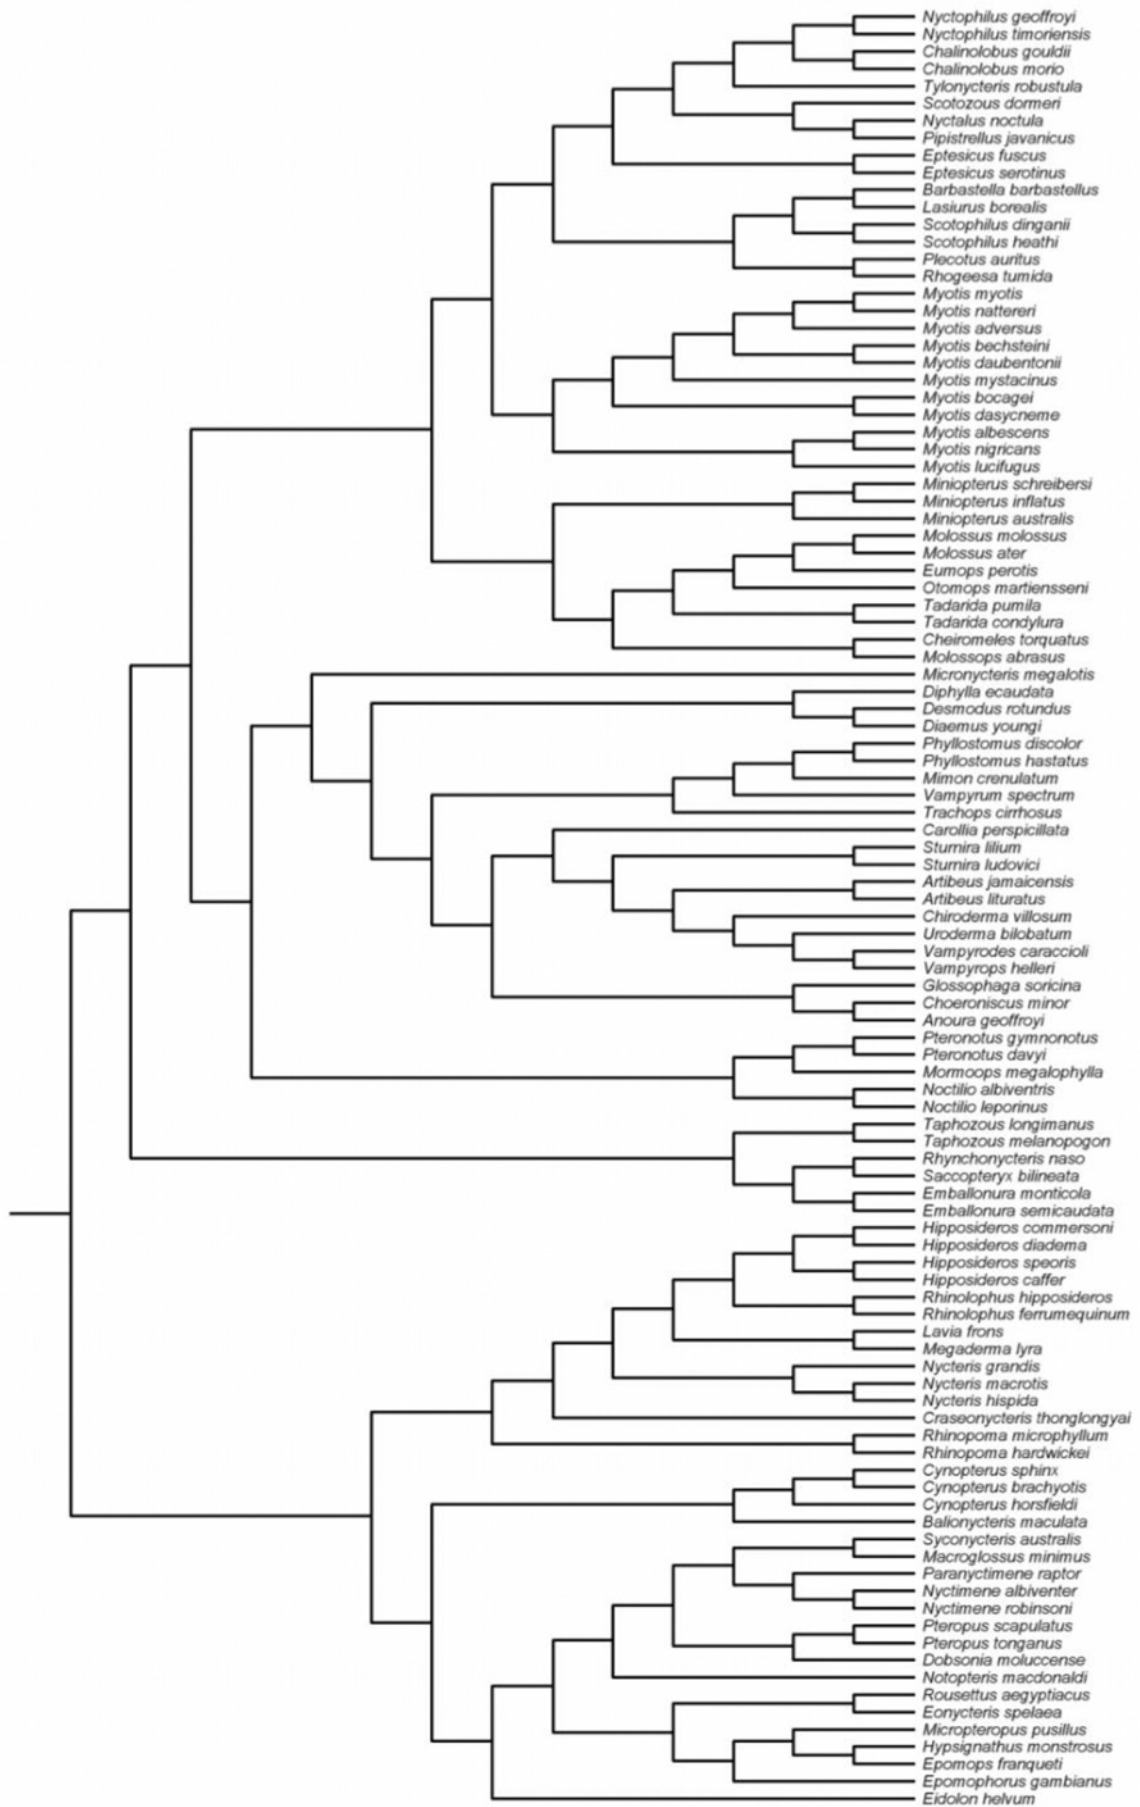

2 Composite tree used in this study to infer relationship between species. For the inter-species relations  
3 we used: (Baker et al. 2003; Baker et al. 2000; Giannini & Simmons 2003; Hooper & Van den Bussche  
4 2003; Jones et al. 2002; Ruedi & Mayer 2001; Teeling et al. 2002; Teeling et al. 2000), for the inter-  
5 familial and lower relationships we used: (Hooper & Van den Bussche 2003; Jones et al. 2002; Teeling  
6 et al. 2002; Teeling et al. 2000) . Where ambiguities were found between references, we gave priority  
7 to the most recent molecular phylogenetic analyses.

## 8 **References**

- 9 Baker, R. J., Hooper, S. R., Porter, C. A. & Van den Bussche, R. A. 2003 Diversification among New  
10 World leaf-nosed bats: An evolutionary hypothesis and classification inferred from  
11 digenomic congruence of DNA sequence. *Occasional Papers, Museum of Texas Tech*  
12 *University* **230**, 1-32.
- 13 Baker, R. J., Porter, C. A., Patton, J. C. & Van den Bussche, R. A. 2000 Systematics of bats of the  
14 family Phyllostomidae based on RAG2 DNA sequences. *Occasional Papers, Museum of*  
15 *Texas Tech University* **202**, 1-16.
- 16 Giannini, N. P. & Simmons, N. B. 2003 A phylogeny of megachiropteran bats (Mammalia :  
17 Chiroptera : Pteropodidae) based on direct optimization analysis of one nuclear and four  
18 mitochondrial genes. *Cladistics-Int. J. Willi Hennig Soc.* **19**, 496-511.
- 19 Hooper, S. R. & Van den Bussche, R. A. 2003 Molecular phylogenetics of the chiropteran family  
20 Vespertilionidae. *Acta Chiropt.* **5**, 1-59.
- 21 Jones, K. E., Purvis, A., MacLarnon, A., Bininda-Emonds, O. R. P. & Simmons, N. B. 2002 A  
22 phylogenetic supertree of the bats (Mammalia : Chiroptera). *Biol. Rev.* **77**, 223-259.
- 23 Ruedi, M. & Mayer, F. 2001 Molecular systematics of bats of the genus *Myotis* (Vespertilionidae)  
24 suggests deterministic ecomorphological convergences. *Mol. Phylogenet. Evol.* **21**, 436-448.
- 25 Teeling, E. C., Madsen, O., Van den Bussche, R. A., de Jong, W. W., Stanhope, M. J. & Springer, M.  
26 S. 2002 Microbat paraphyly and the convergent evolution of a key innovation in Old World  
27 rhinolophoid microbats. *Proc. Natl. Acad. Sci. U. S. A.* **99**, 1431-1436.

28 Teeling, E. C., Scally, M., Kao, D. J., Romagnoli, M. L., Springer, M. S. & Stanhope, M. J. 2000  
29 Molecular evidence regarding the origin of echolocation and flight in bats. *Nature* **403**, 188-  
30 192.
